# Supplementary material
Source: publisher figshare collection journal article supplement (https://acs.figshare.com/ndownloader/files/17573495)
Supplement: Supplementary file 1 [file 17573495]

# Supporting Information

## Tetraphenylethylene @ Graphene Oxide with Switchable Fluorescence Triggered by Mixed Solvents for the Application of Repeated Information Encryption and Decryption

*Mengmeng Qin,<sup>\*,†,‡,§</sup> Yuxiao Xu,<sup>†</sup> H. Gao,<sup>⊥</sup> Guoying Han,<sup>†</sup> Rong Cao,<sup>†</sup> Peili Guo,<sup>†</sup> Wei Feng,<sup>\*,‡</sup> and Li Chen<sup>\*,†,‡,§</sup>*

<sup>†</sup>School of Materials Science and Engineering, Tianjin University of Technology, Tianjin 300384, P. R. China

<sup>‡</sup>Tianjin Key Laboratory for Photoelectric Display Materials and Devices, Tianjin 300384, China

<sup>§</sup>Key Laboratory of Photoelectric Display Materials and Devices, Ministry of Education, Tianjin 300384, P. R. China

<sup>‡</sup>School of Materials Science and Engineering, Tianjin University, Tianjin 300072, P. R. China

<sup>⊥</sup>School of Chemistry and Chemical Engineering, Tianjin University of Technology, Tianjin 300384, P. R. China

Corresponding Authors

\*Mengmeng Qin, E-mail: qmm@tju.edu.cn

\*Wei Feng, E-mail: weifeng@tju.edu.cn

\*Li Chen, E-mail: chenli@tjut.edu.cn

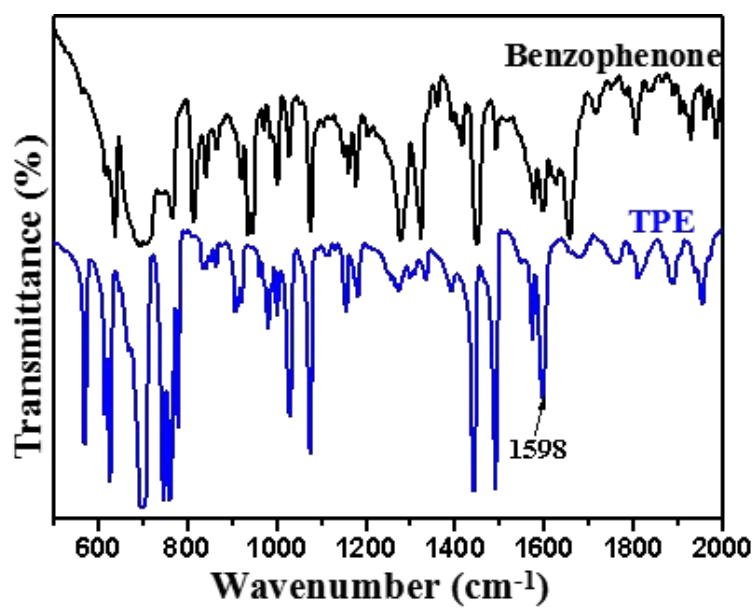

**Figure S1.** FTIR spectra of TPE and Benzophenone.

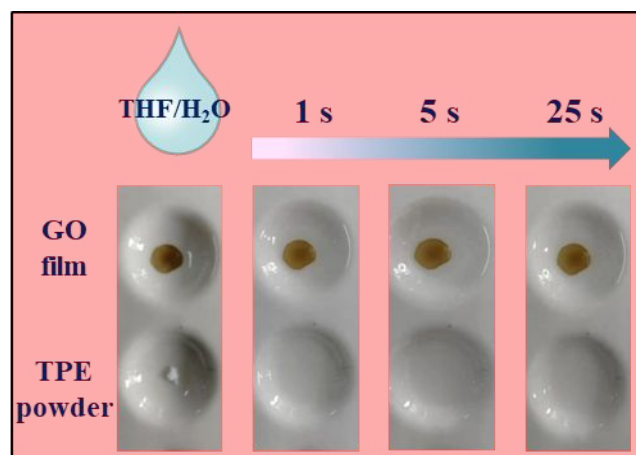

**Figure S2.** The dispersibility of GO film and TPE powder in THF/H<sub>2</sub>O ( $V_{\text{THF}} = 60\%$ ).

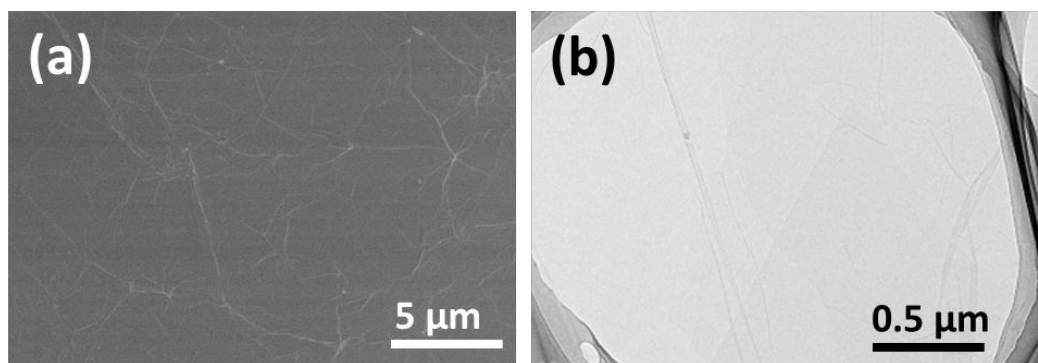

**Figure S3.** (a) SEM and (b) TEM images of GO.

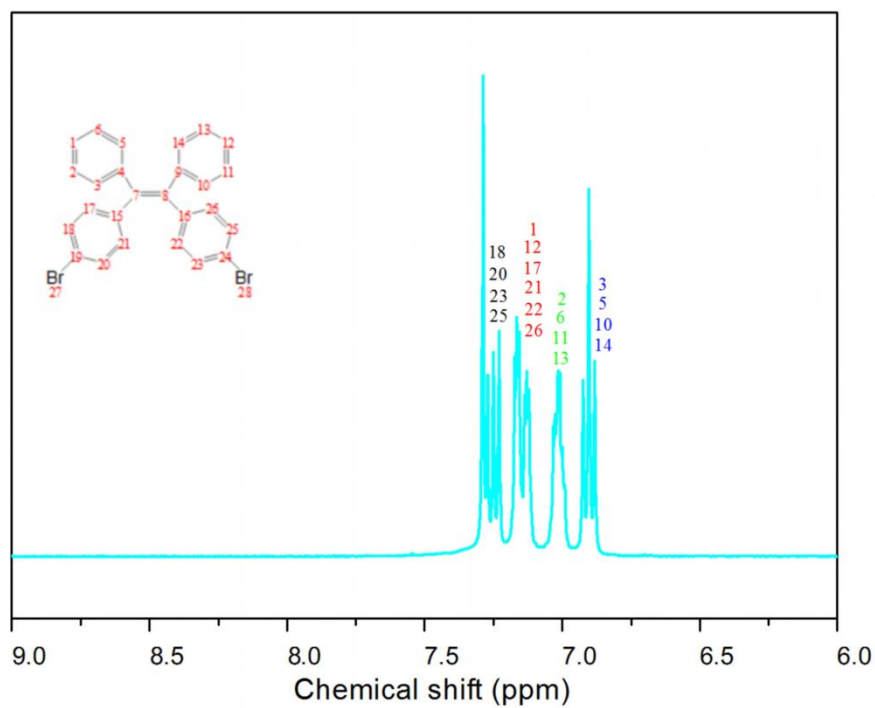

**Figure S4.** <sup>1</sup>H NMR spectrum of TPEDBr in CDCl<sub>3</sub>.

δ (ppm):

7.28-7.22 (m, 4H; Ar H)

7.18-7.10 (m, 6H; Ar H)

7.04-6.98 (m, 4H; Ar H)

6.93-6.89 (m, 4H; Ar H)

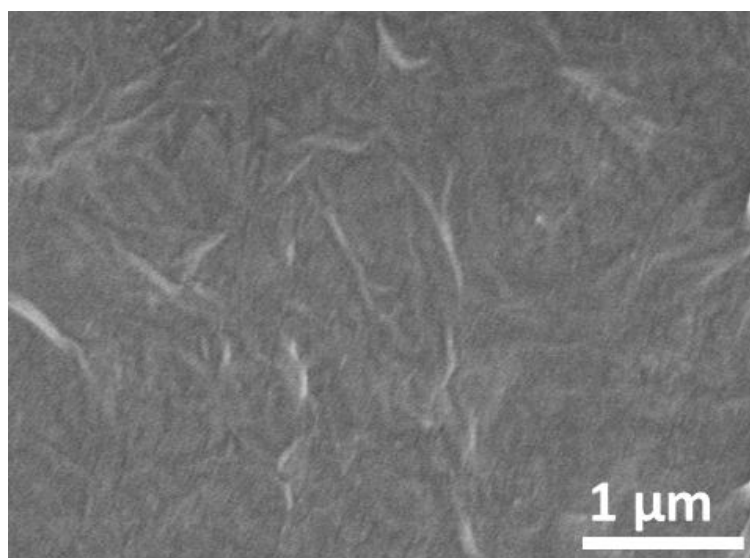

**Figure S5.** SEM image of TPE@GO (No. 2) treated with DMF/H<sub>2</sub>O.

The evolution of peak-forest is a very complex process including the CaCO<sub>3</sub>-H<sub>2</sub>O-CO<sub>2</sub> interactions.<sup>1,2</sup> The commonly reported evolution process mainly includes two stages. Firstly, seawater containing much CO<sub>2</sub> could react with Ca<sup>2+</sup> to give CaCO<sub>3</sub>, which was finally deposited in the seabed and formed the limestone over a long period. Secondly, due to the crustal movement, the seabed evolved into dry land, and the limestone could form the peak-forest during the etching of rainwater containing CO<sub>2</sub>.

[1] Tang, T.; Day, M., Field survey and analysis of hillslopes on tower karst in Guilin southern China. *Earth Surface Processes and Landforms* **2000**, 25, 1221-1235.

[2] Liu, Z.; Groves, C.; Yuan, D.; Meiman, J.; Jiang, G.; He, S.; Li, Q., Hydrochemical variations during flood pulses in the south-west China peak cluster karst: impacts of CaCO<sub>3</sub>-H<sub>2</sub>O-CO<sub>2</sub> interactions. *Hydrological Processes* **2004**, 18, 2423-2437.
